# Supplementary material
Source: PubMed Central journal article supplement (PMC3042124)

### A panel of subunit-selective activity-based proteasome probes

Martijn Verdoes<sup>1,3</sup>, Lianne I. Willems<sup>1</sup>, Wouter A. van der Linden<sup>1</sup>, Boudewijn A. Duivenvoorden<sup>1</sup>,  
Gijsbert A. van der Marel<sup>1</sup>, Bogdan I. Florea<sup>1</sup>, Alexei F. Kisselev<sup>2\*</sup> and Herman S. Overkleeft<sup>1\*</sup>

<sup>1</sup>Leiden Institute of Chemistry, Gorlaeus Laboratories, Leiden University, PO Box 9502, 2300 RA Leiden,  
The Netherlands

<sup>2</sup>Department of Pharmacology and Toxicology, Norris Cotton Cancer Center, Dartmouth Medical School,  
1 Medical Center Drive, HB7936, Lebanon NH 03756, USA

<sup>3</sup>Present address: Department of Pathology, Stanford University School of Medicine, Stanford, CA 94305,  
USA

### Electronic Supplementary information

#### <sup>1</sup>H NMR spectra

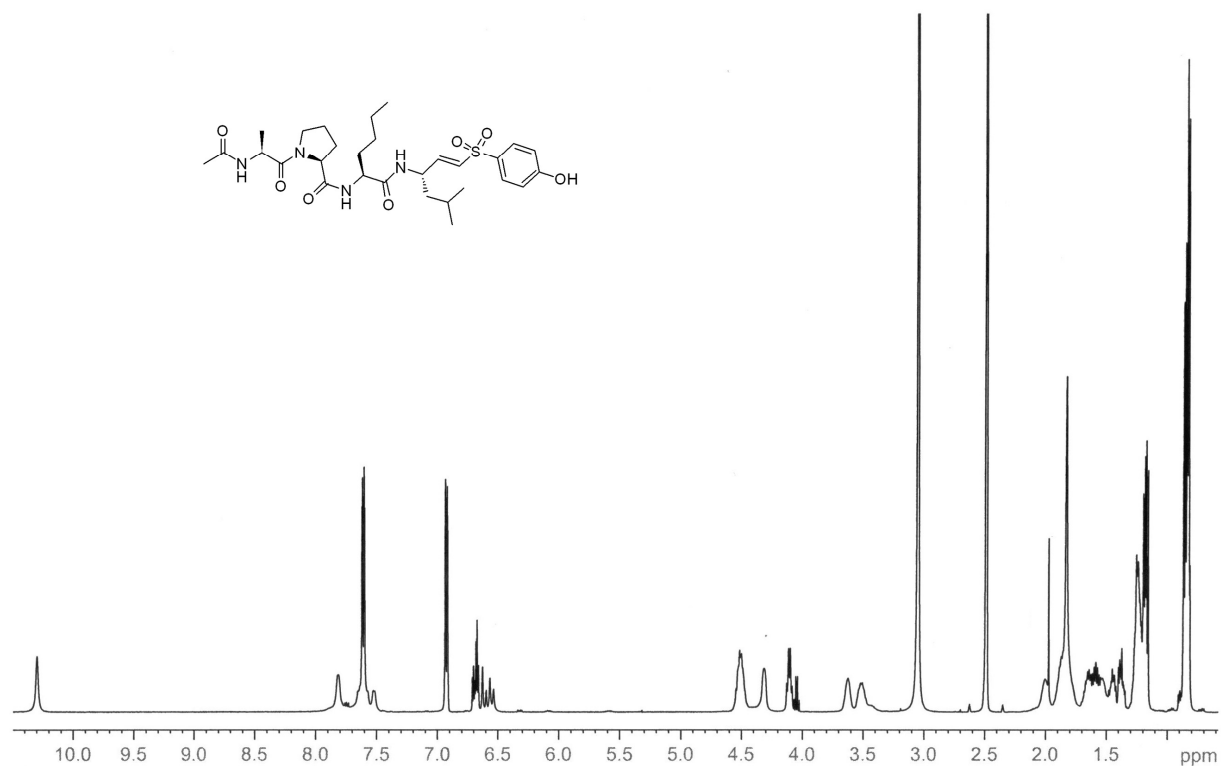

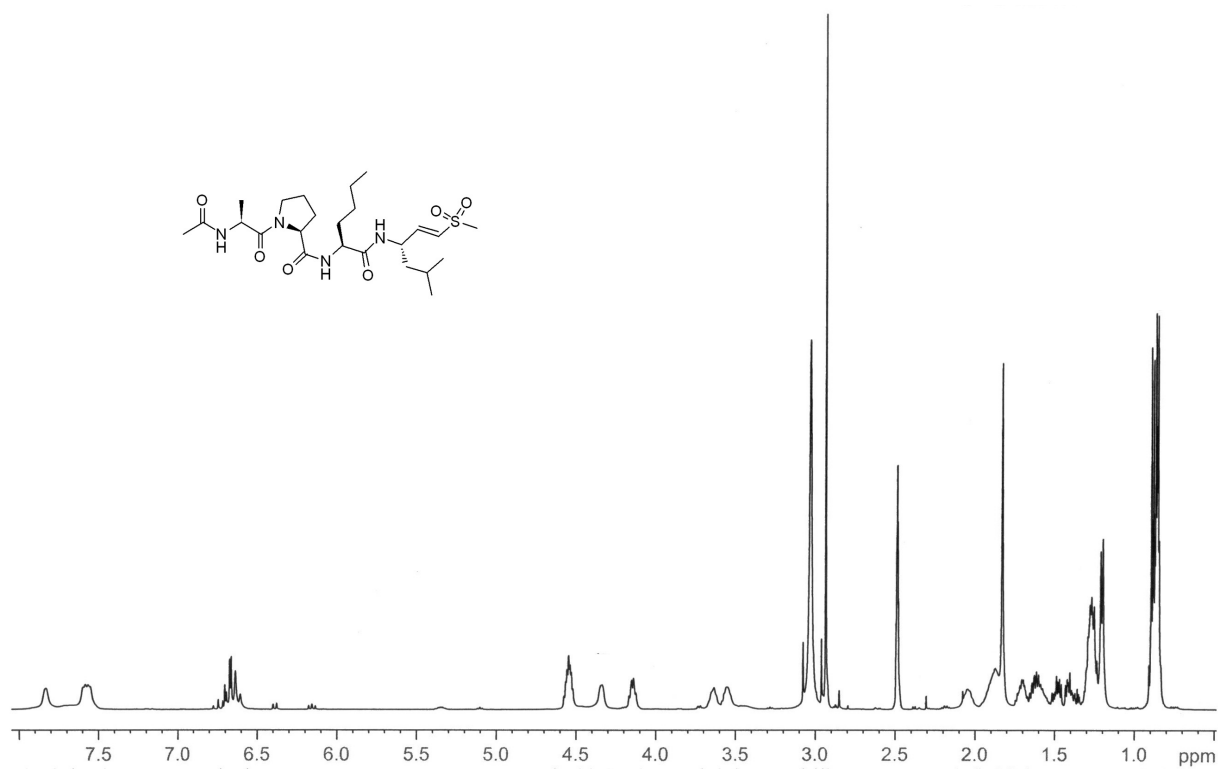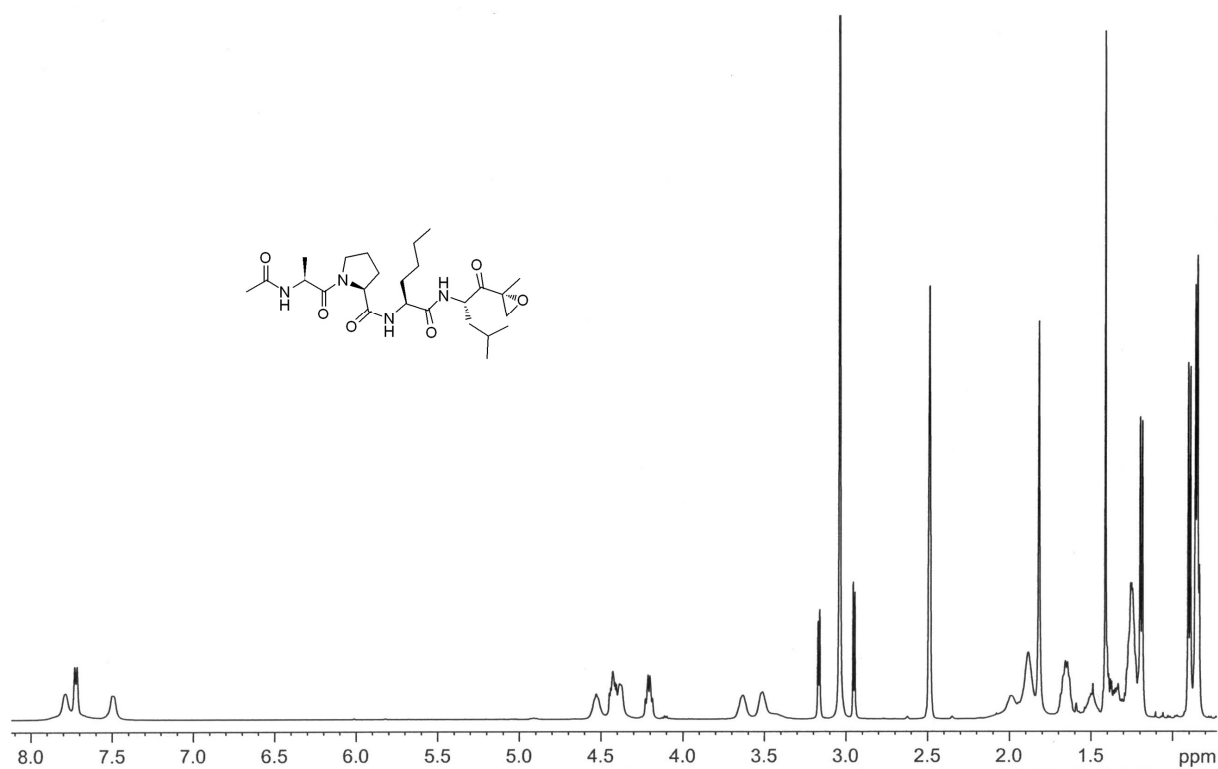

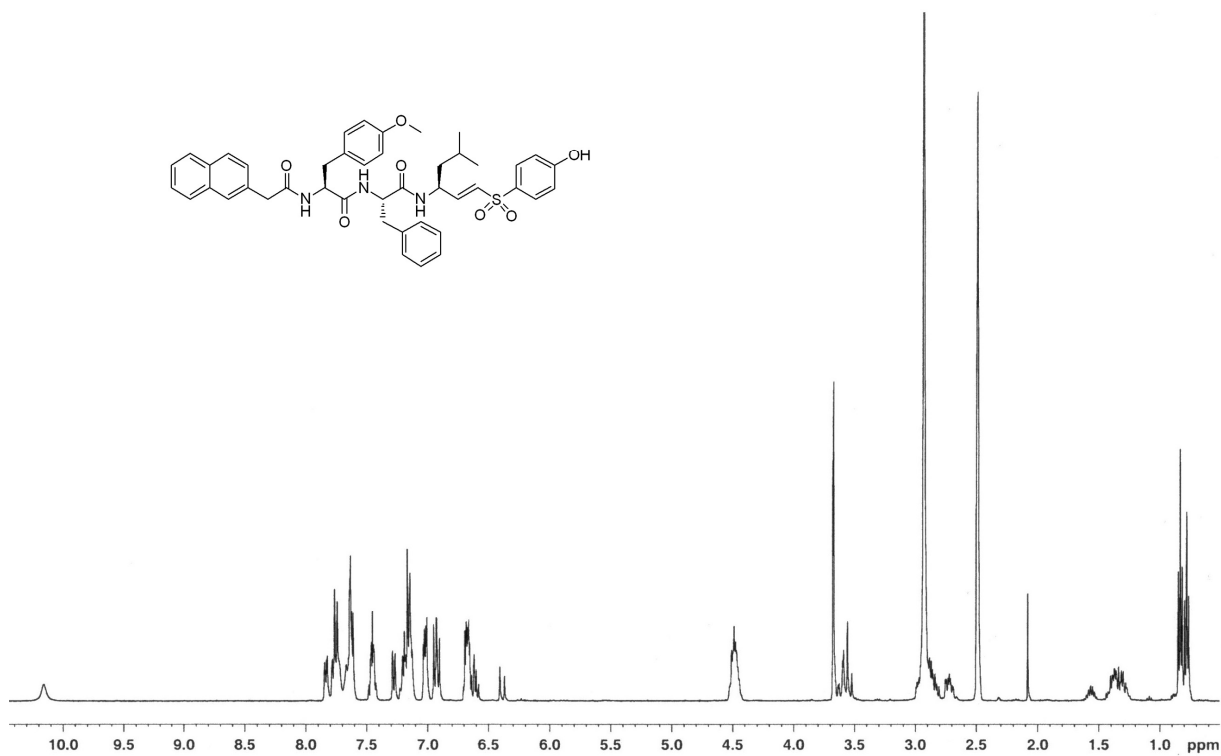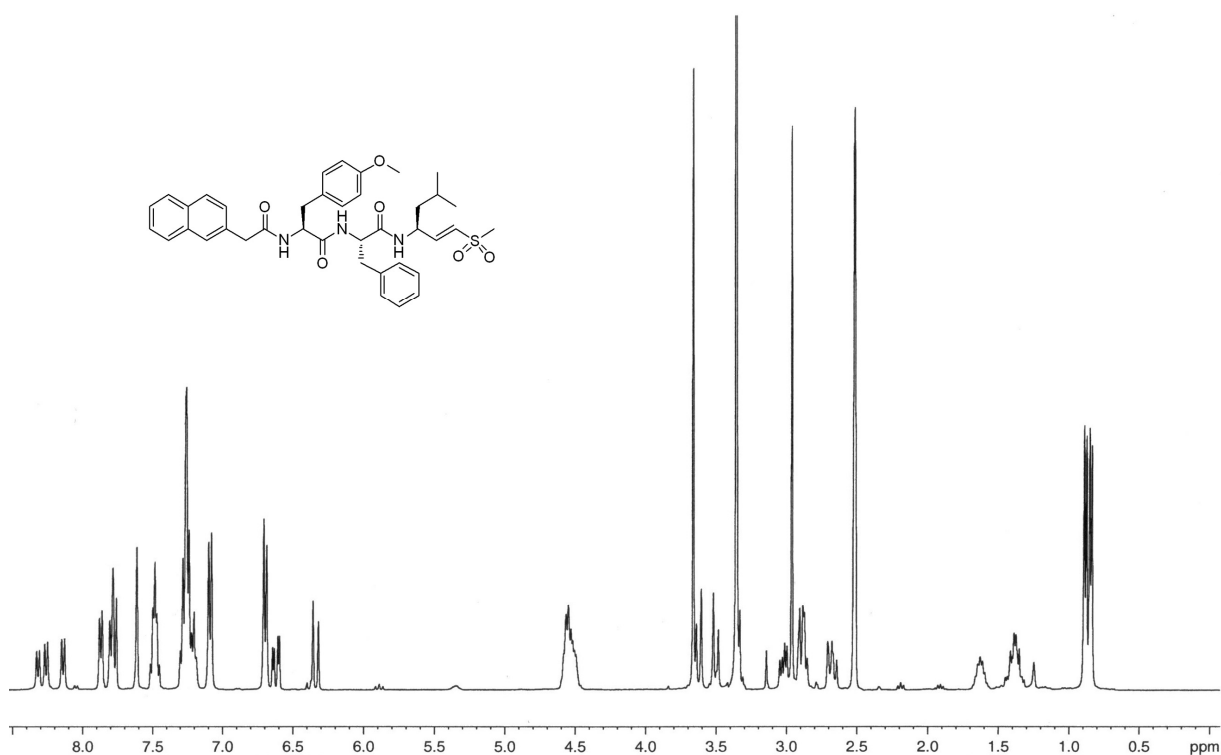

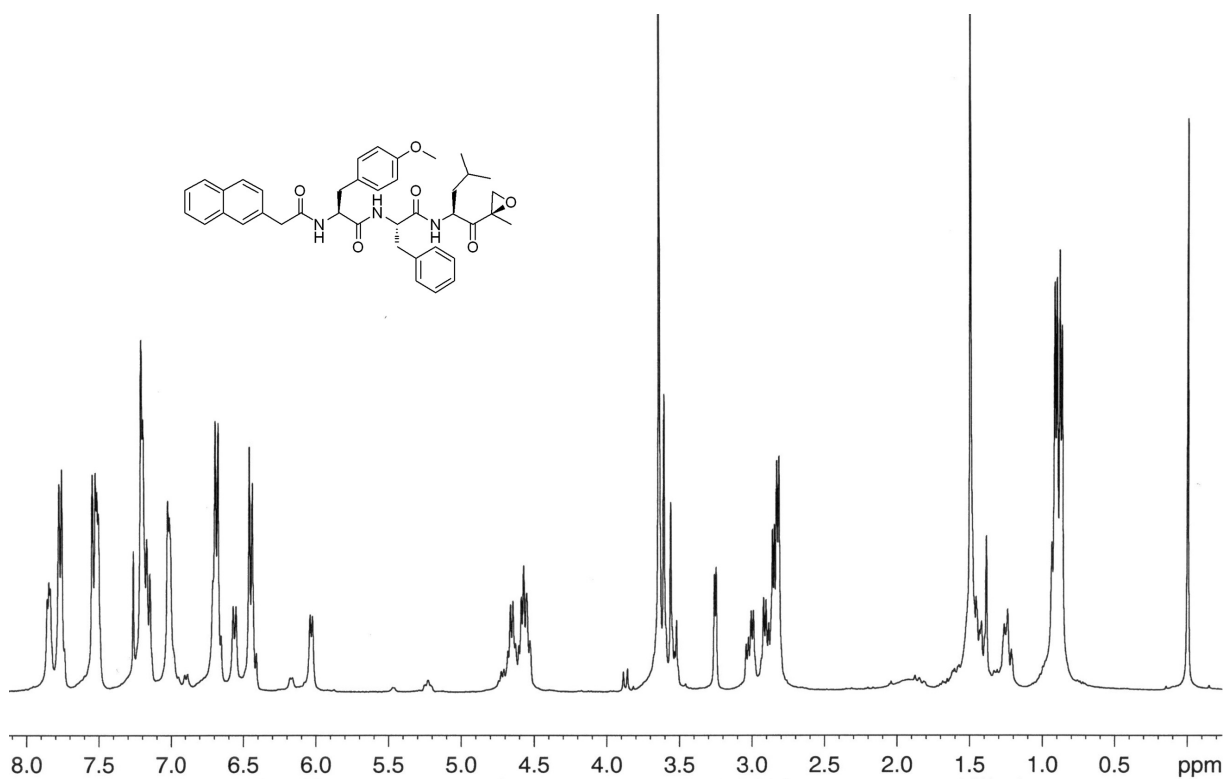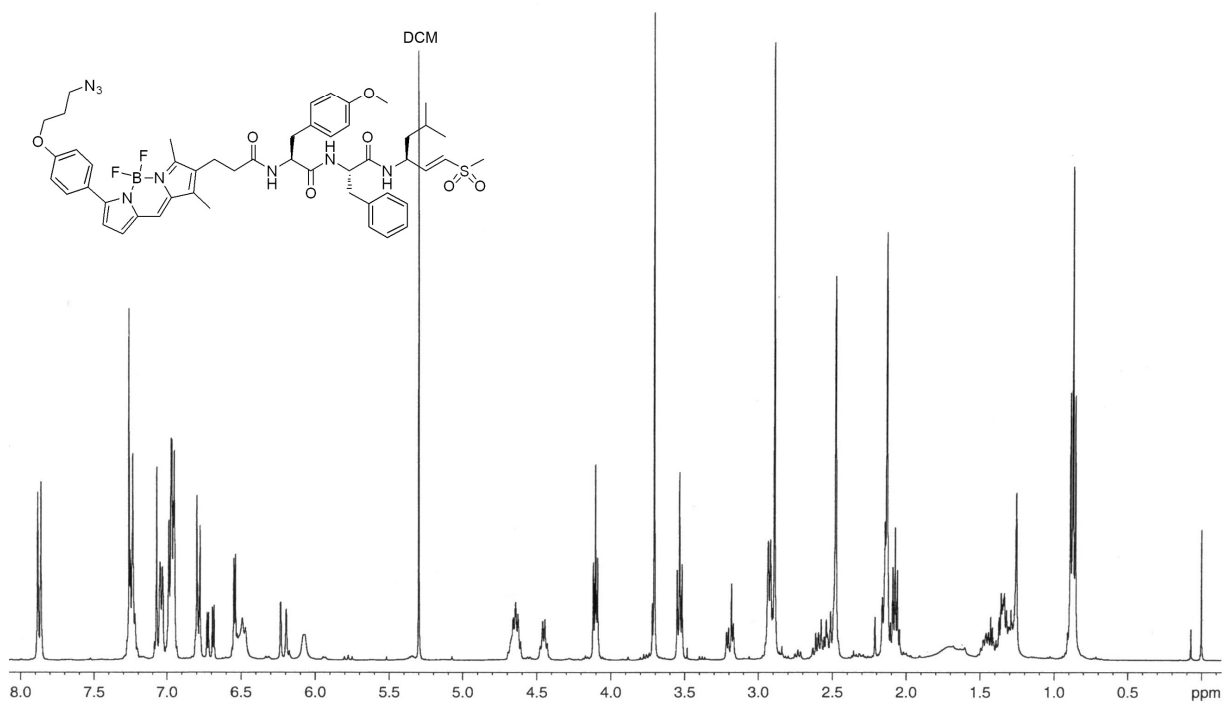

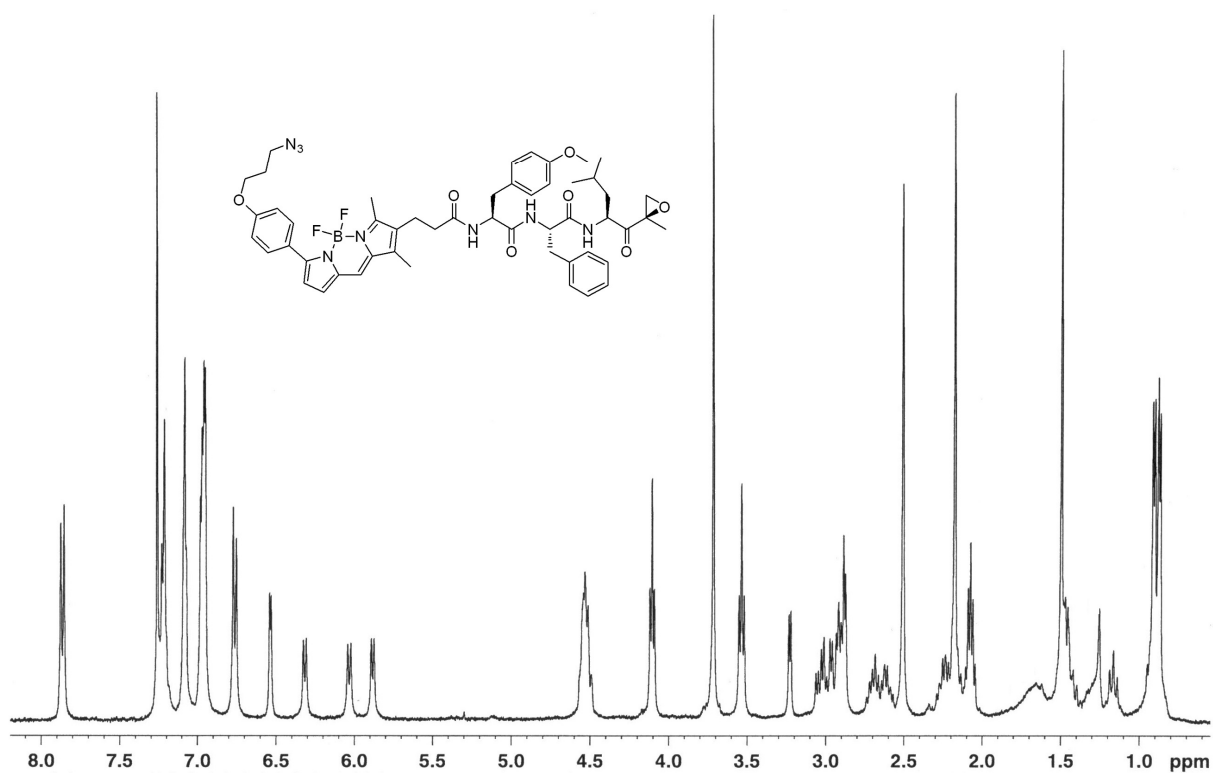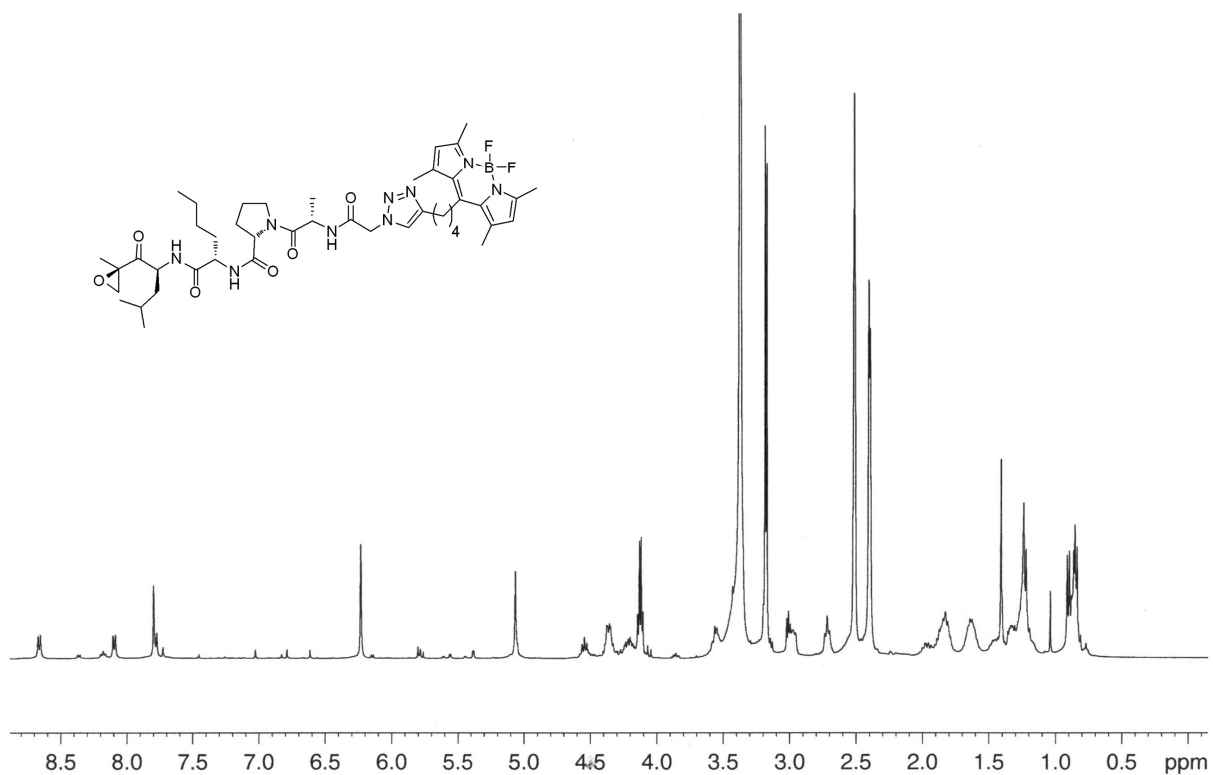

Supplement: NIHMS268413-supplement-Supplementary_Info.pdf [file NIHMS268413-supplement-Supplementary_Info.pdf]
